# Supplementary material for: Active nuclear import and passive nuclear export are the primary determinants of TDP-43 localization
Source: Sci Rep. 2018 May 4;8:7083. doi: 10.1038/s41598-018-25008-4 (PMC5935693; doi:10.1038/s41598-018-25008-4)
Supplement: Supplementary file 1 — Supplementary Figures [file 41598_2018_25008_MOESM1_ESM.pdf]

**Active nuclear import and passive nuclear export are the primary determinants of TDP-43 localization**

**Authors:** Emile S. Pinarbasi<sup>1,2</sup>, Tolga Cağatay<sup>3</sup>, Ho Yee Joyce Fung<sup>3</sup>, Ying C Li<sup>2, 4</sup>, Yuh Min Chook<sup>3</sup>, Philip J. Thomas<sup>1\*</sup>

<sup>1</sup>Department of Physiology, UT Southwestern Medical Center at Dallas, Dallas, TX 75390

<sup>2</sup>Medical Scientist Training Program, UT Southwestern Medical Center at Dallas, Dallas, TX, 75390

<sup>3</sup>Department of Pharmacology, UT Southwestern Medical Center at Dallas, Dallas, TX 75390

<sup>4</sup>Department of Neuroscience, UT Southwestern Medical Center at Dallas, Dallas, TX 75390

# Supplementary Figure S1

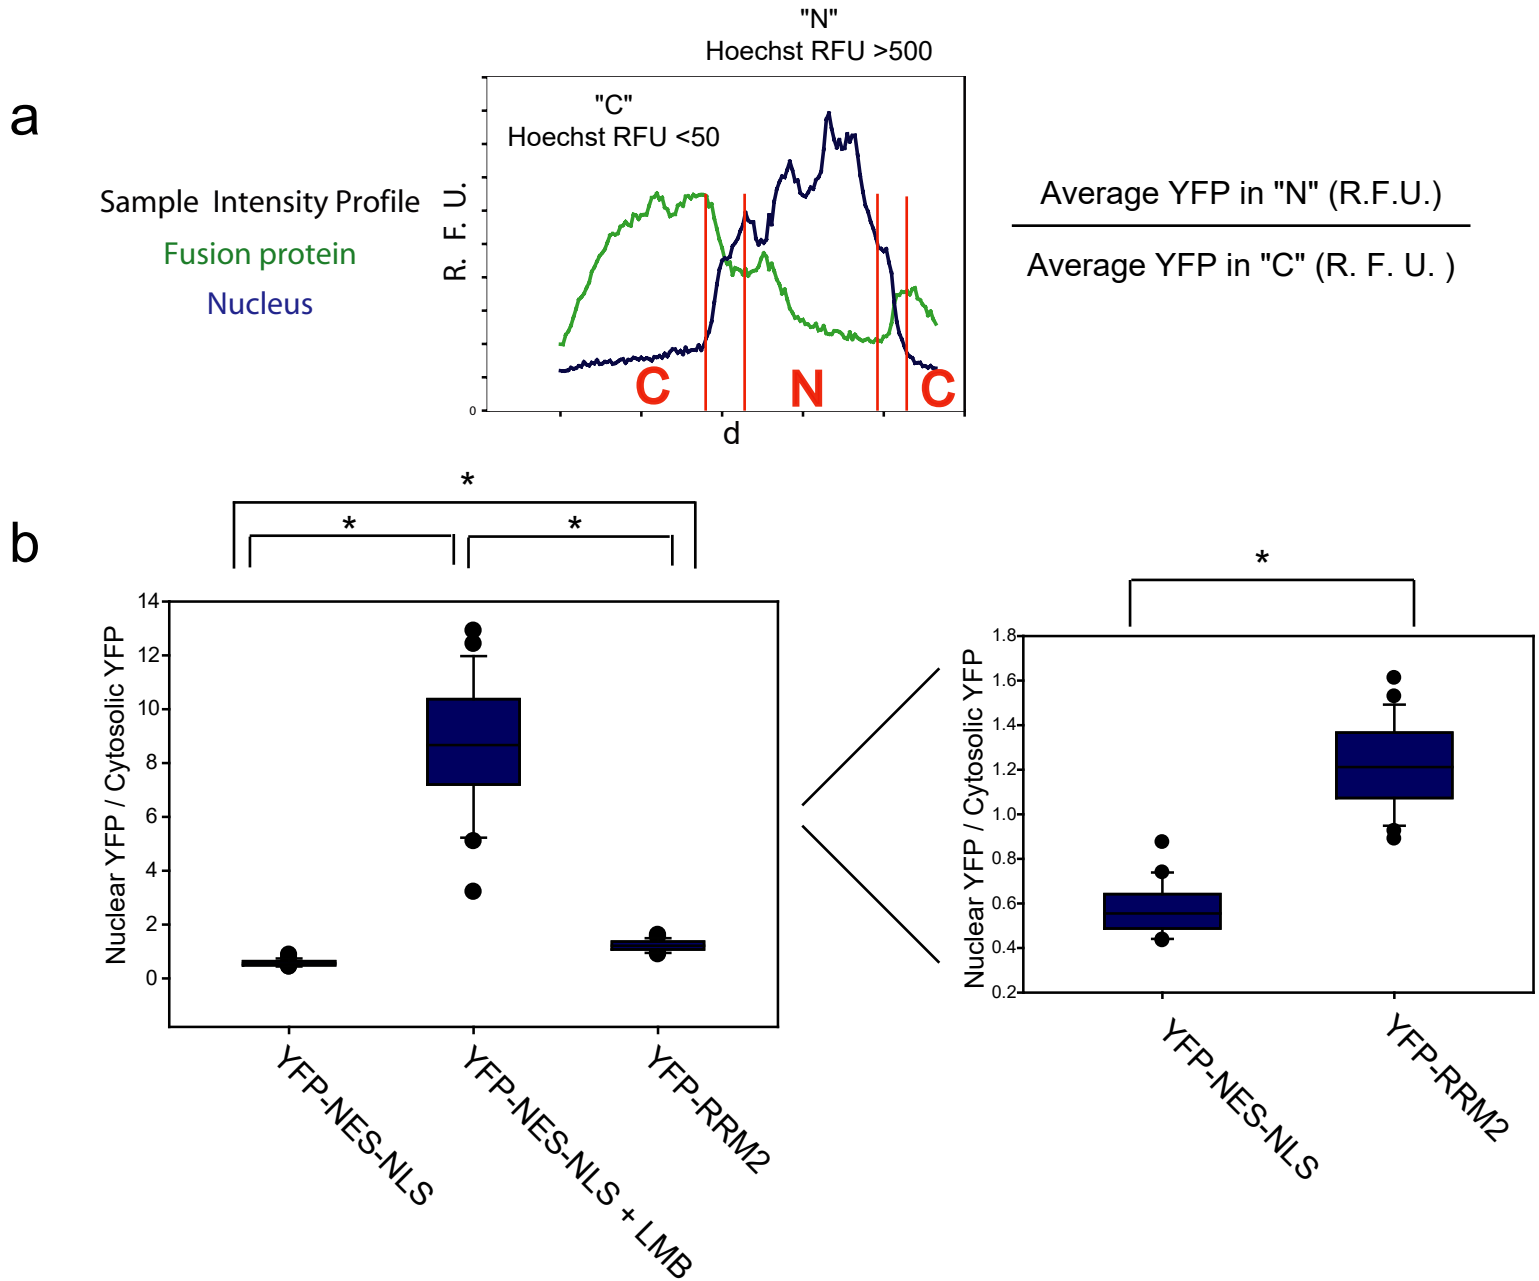

**Supplementary Figure S1. Nuclear exclusion, nuclear inclusion, and distributed phenotypes can be quantified**

- Calculation of the "Nuclear YFP/Cytosolic YFP" based on a sample intensity profile.
- Box and whiskers plot comparison of "Nuclear YFP/Cytosolic YFP" in HeLa cells (from Figure 2) transfected with the indicated YFP fusion protein. n=20 cells from two independent experiments.\* represents p<0.001 in Mann-Whitney Rank Sum Test. Right: selected values plotted on smaller scale for direct comparison.

## Supplementary Figure S2

a

$$\text{Shuttling Index} = \frac{(R-B)}{(D-B)}$$

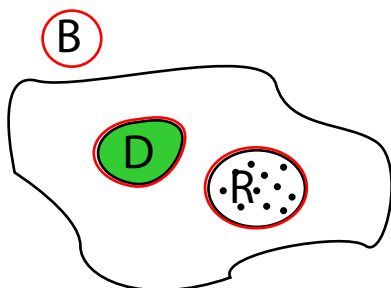

SI ~ 0

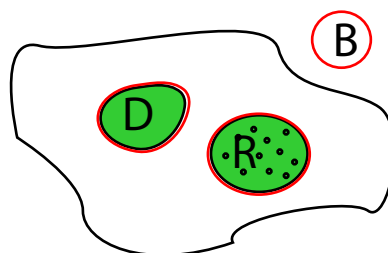

SI > 1

b

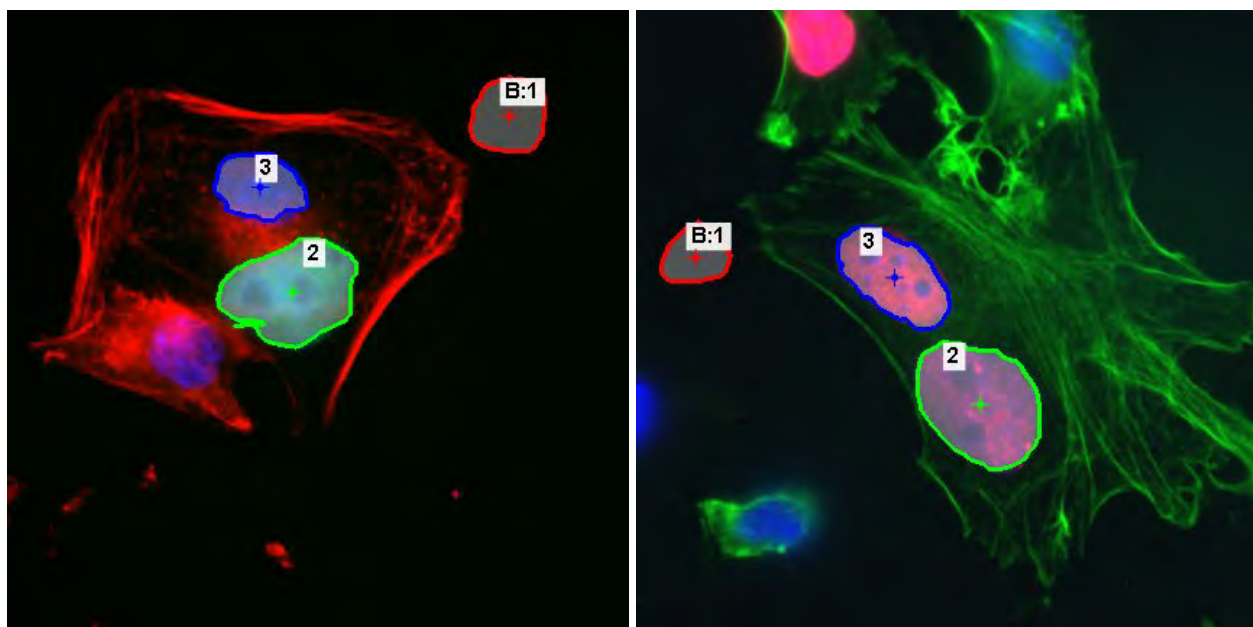

### Supplementary Figure S2. Quantitation of Heterokaryon shuttling assays

- a. Schematic demonstrating quantitation of heterokaryon shuttling assays.
- b. Sample images from quantitation of heterokaryon shuttling assays. "B:1" : background fluorescence, "2" : donor nucleus (HeLa), "3": recipient nucleus (3T3). Shown in merged view: Left: Hoescht stain: blue, Actin skeleton: red, YFP-hnRNPC: green. Right: Hoescht stain: blue, Actin skeleton: green, Flag TDP-43: red.

# Supplementary Figure S3

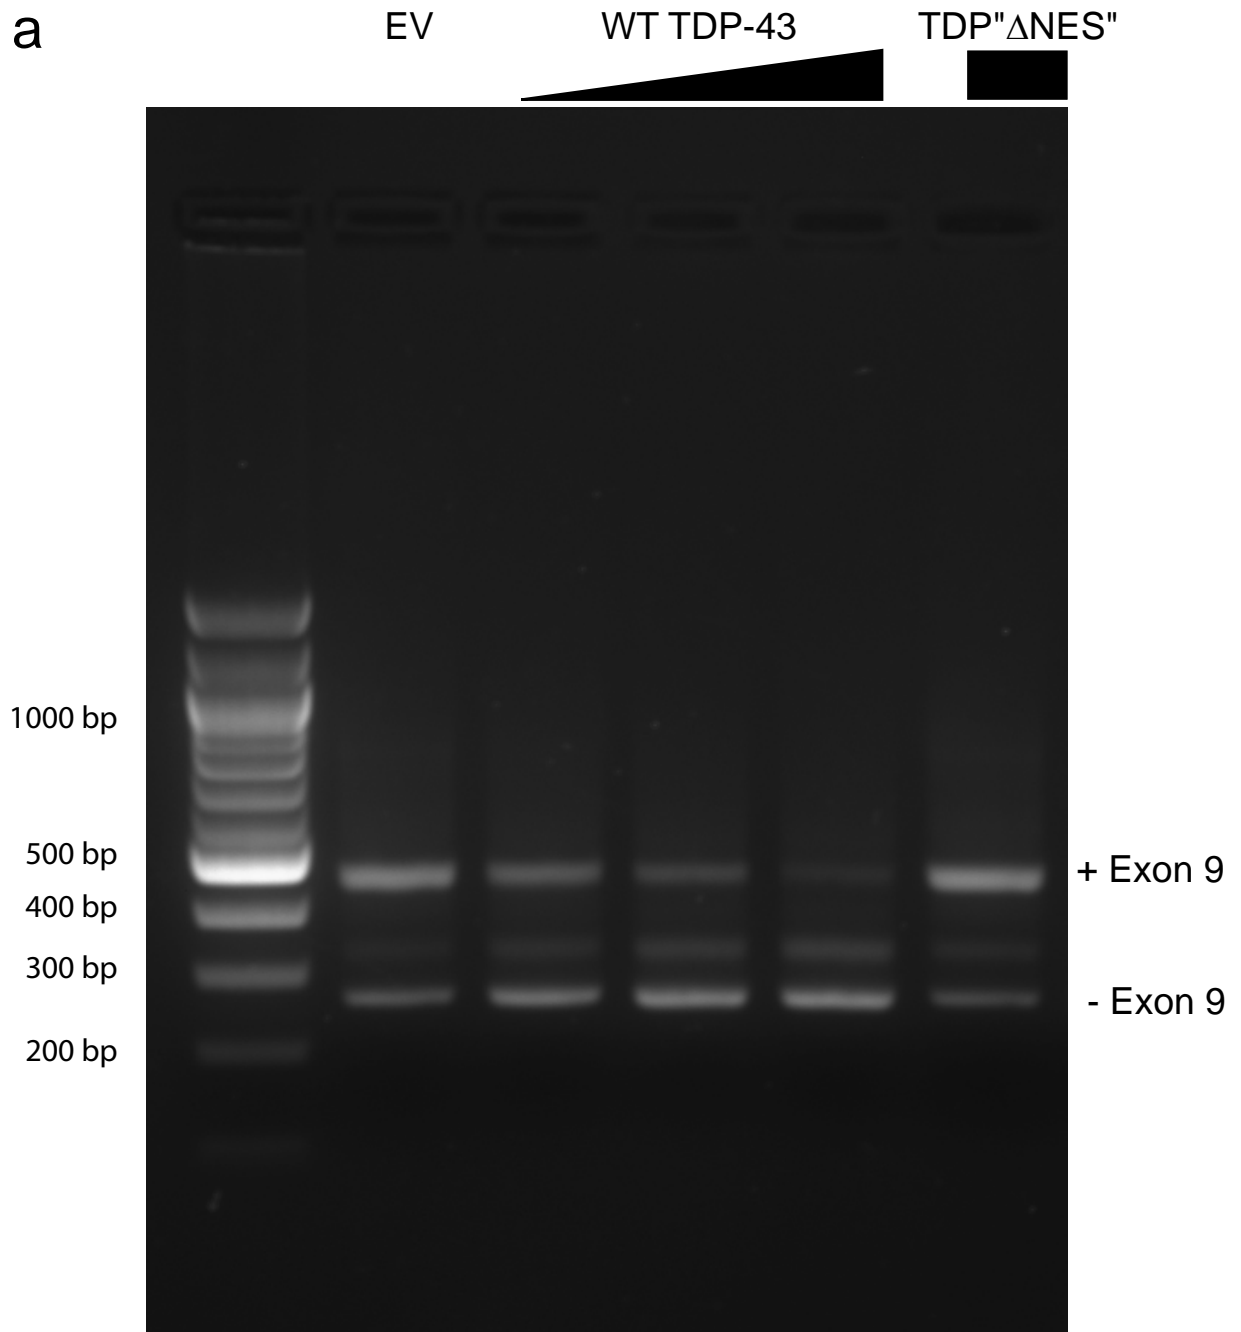

b

TDP-43

100 kDa  
80 kDa  
58 kDa  
46 kDa  
32 kDa

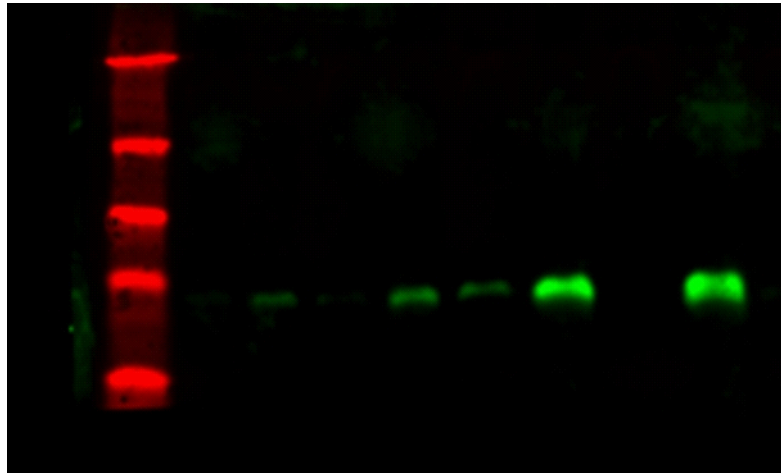

GAPDH

100 kDa  
80 kDa  
58 kDa  
46 kDa  
32 kDa

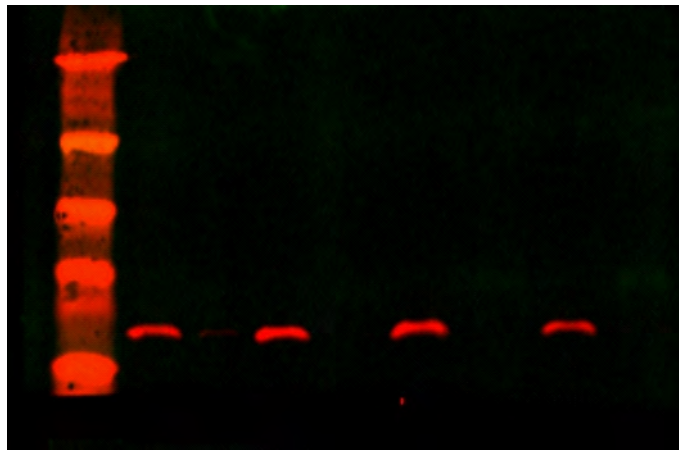

Histone H3

25 kDa  
22 kDa

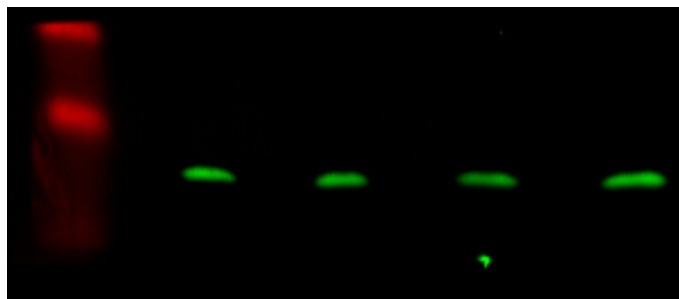

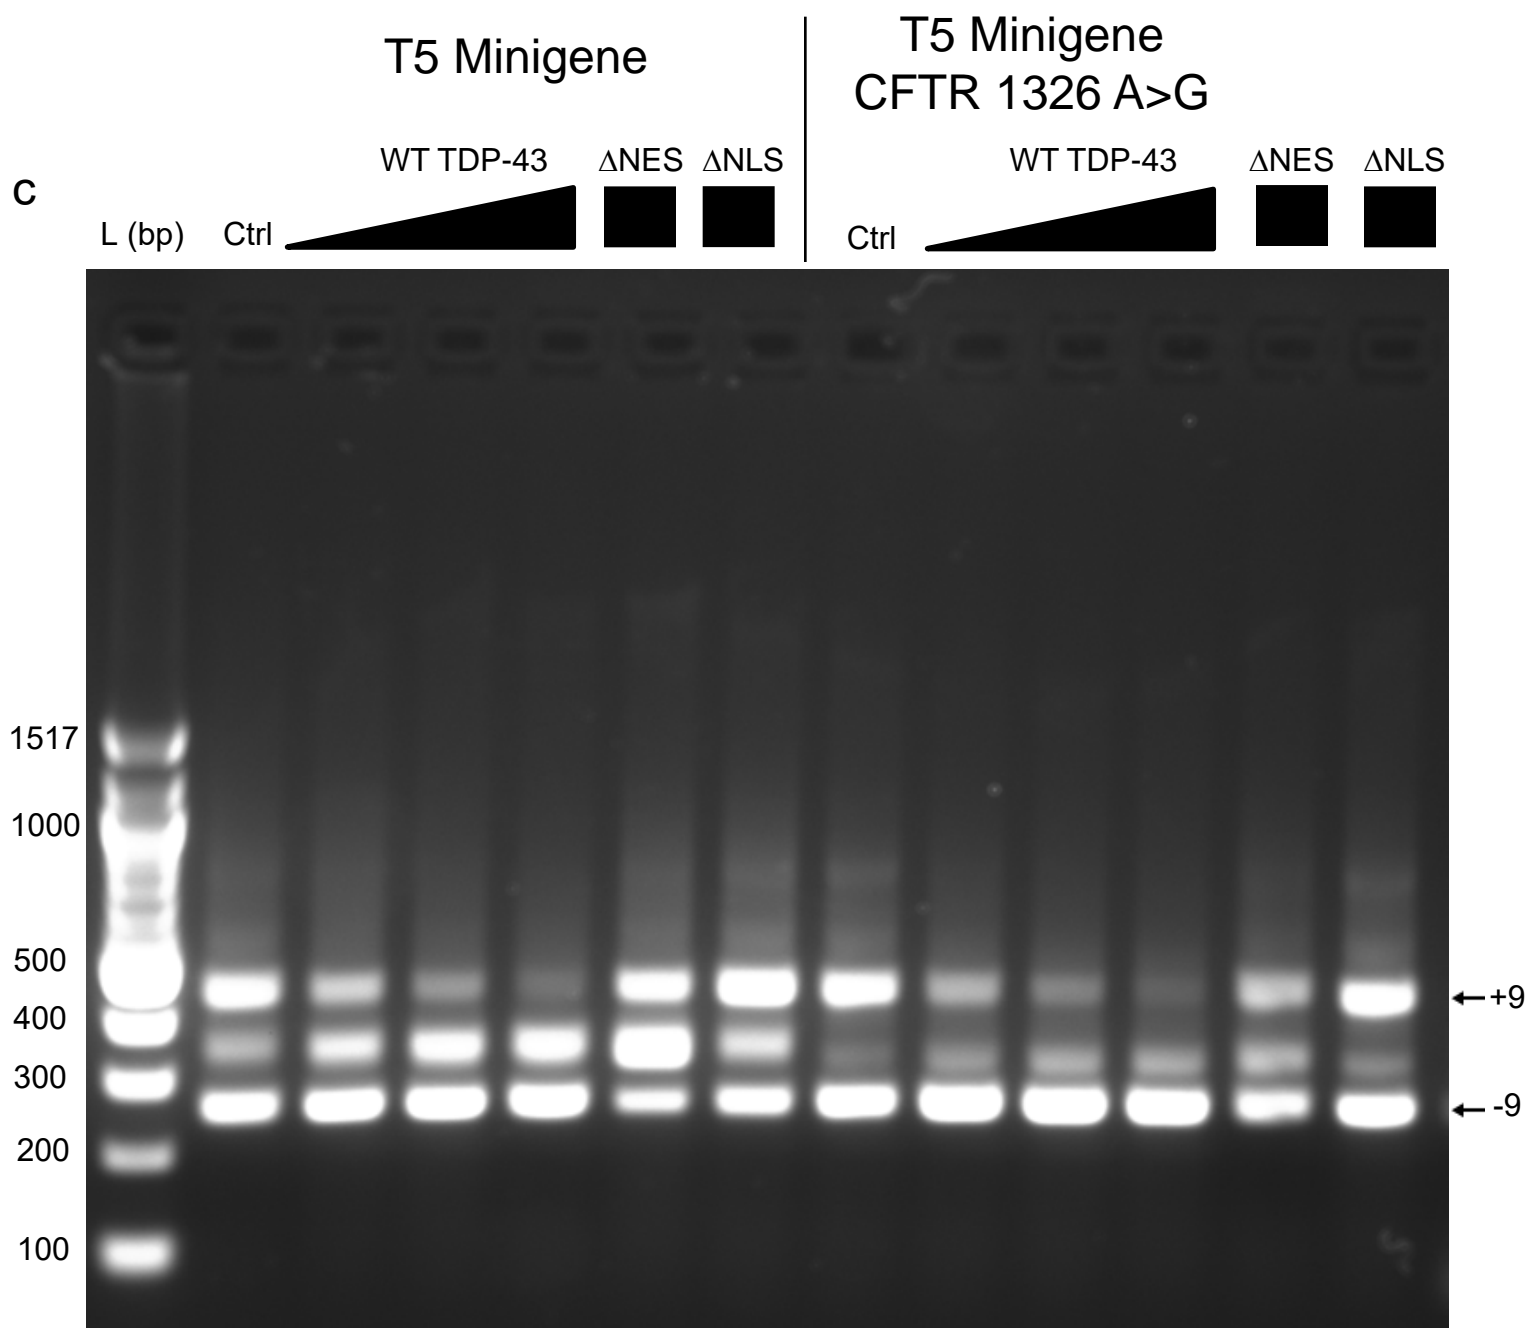

**Supplementary Figure S3. CFTR T5 minigene with 1326A>G exhibits TDP-43 dependent CFTR exon 9 skipping.**

- a. Uncropped gel from Figure 4a
- b. Uncropped images from Figure 4b. Western blot membrane was cut, and the top was probed for TDP-43 and GAPDH using different secondary antibodies. The bottom was probed for Histone H3.
- c. CFTR exon 9 splicing assay: HeLa cells were cotransfected with TDP-43 and CFTR T5 minigene (original or 1326 A>G). The "Ctrl" lane was cotransfected with empty vector cDNA and the CFTR T5 minigene. Cells in the three WT TDP-43 conditions were transfected with: 0.05 ug WT TDP-43 cDNA, 0.15 ug WT TDP-43 cDNA, and 0.5 ug WT TDP-43 cDNA. Cells in the mutant TDP-43 conditions were transfected with 0.5 ug TDP-43 cDNA. RNA was extracted and reverse-transcribed; cDNA was PCR amplified and run on an agarose gel. On the far left is the DNA ladder; bp stands for base pairs.

## Supplementary Figure S4

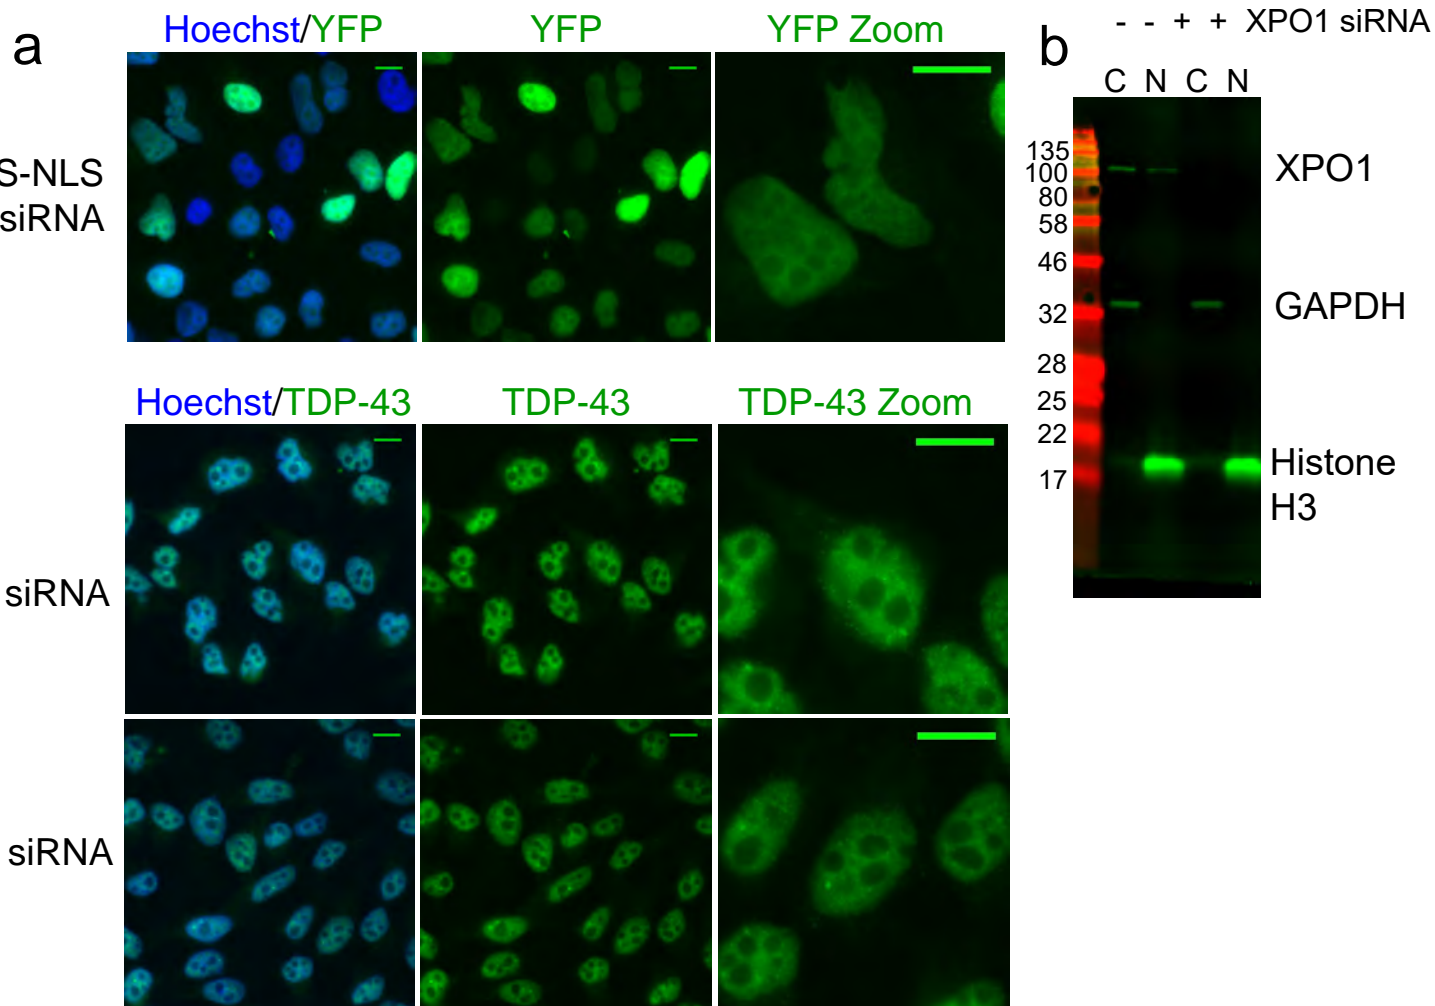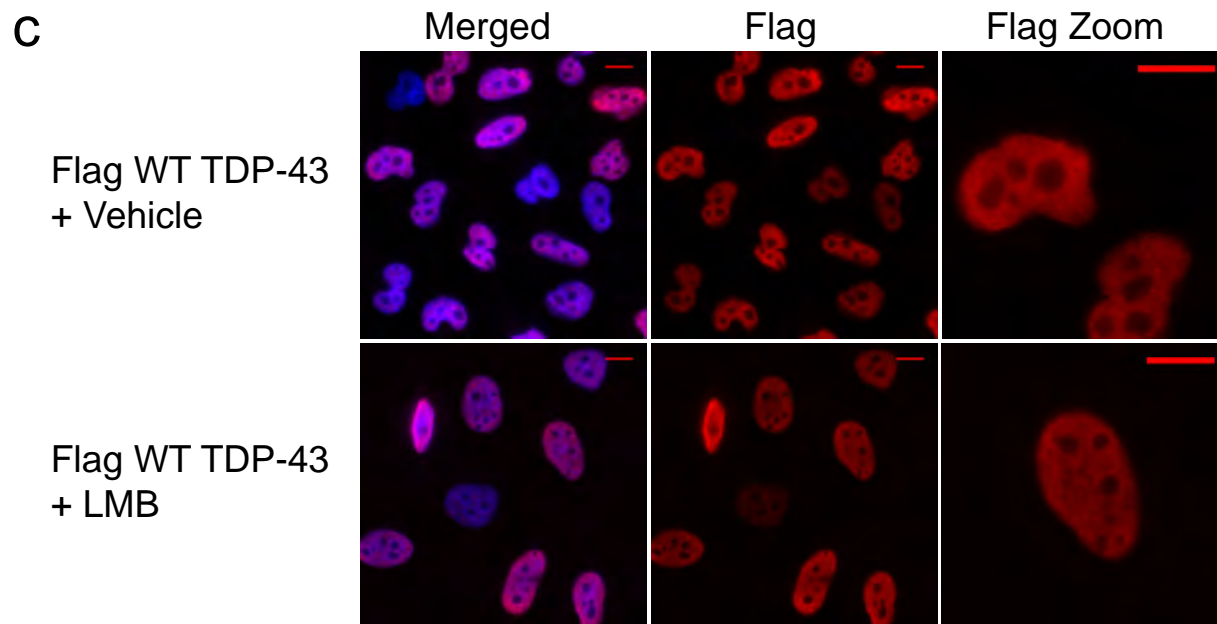

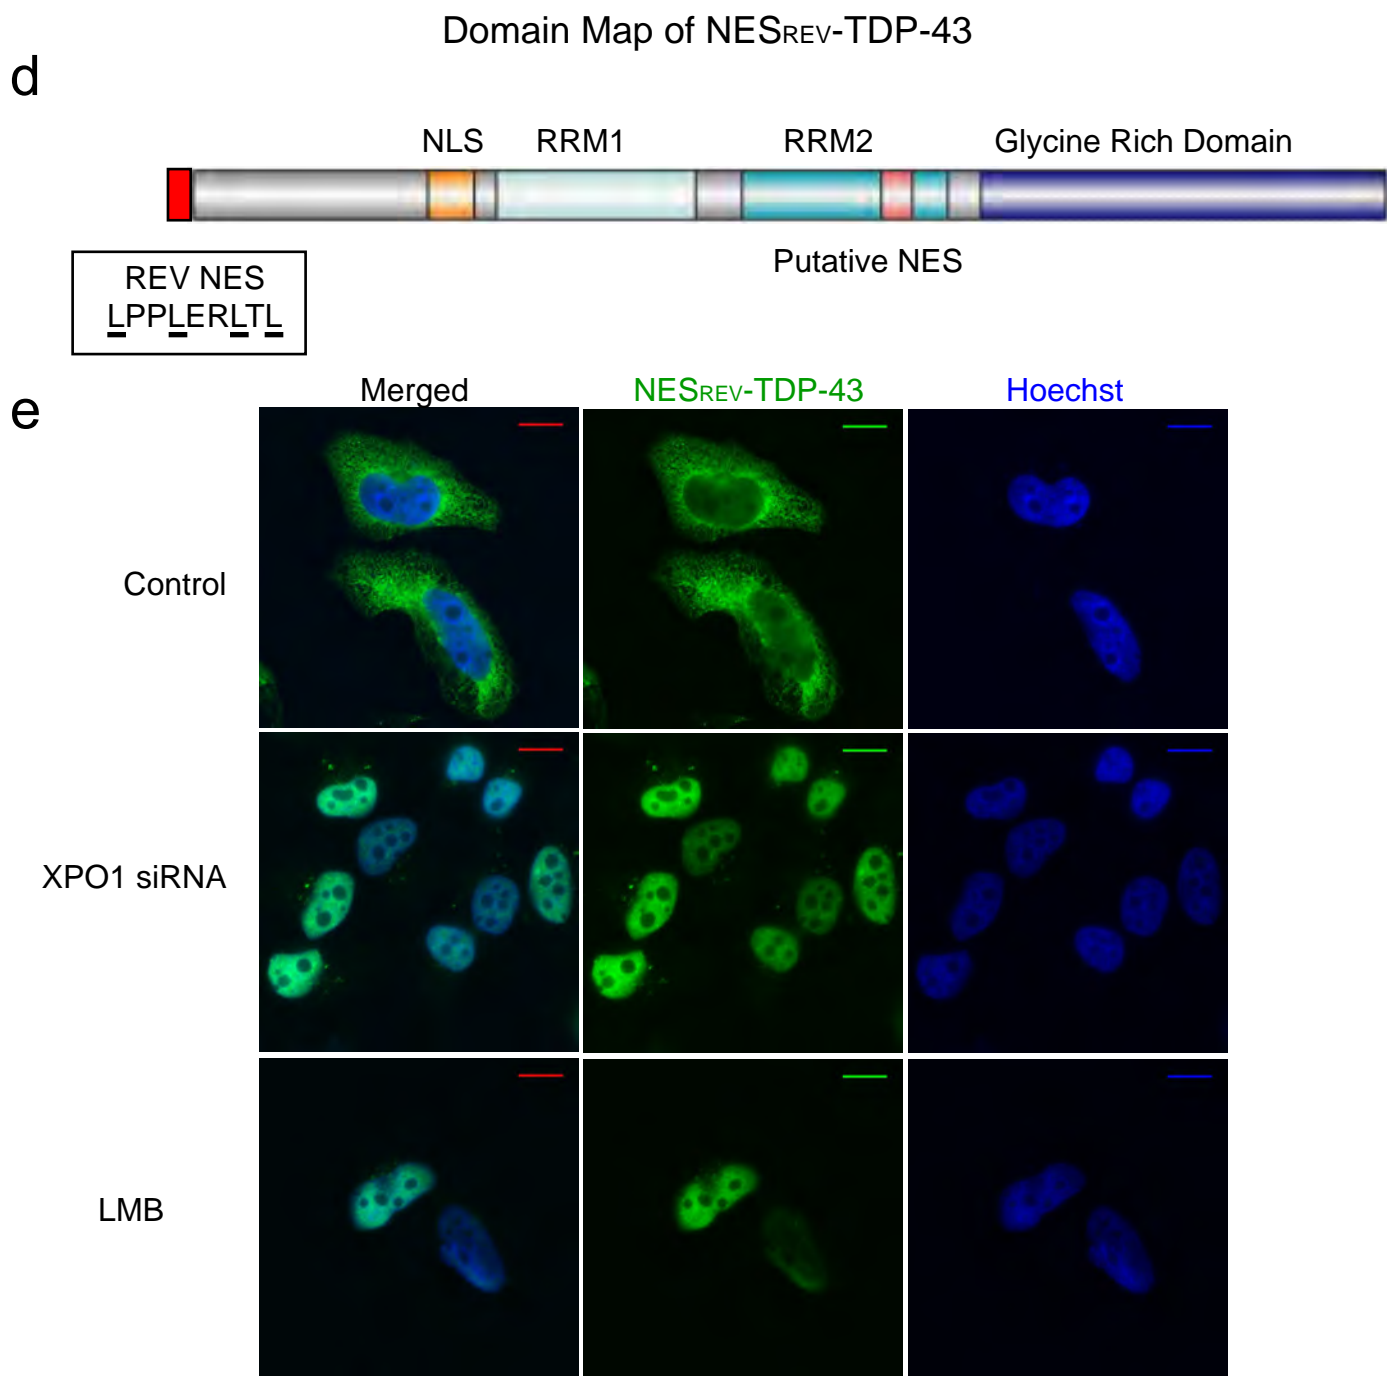

**Supplementary Figure S4. WT TDP-43 is predominantly nuclear and does not contain a nuclear retention signal**

- Top: direct fluorescence of HeLa cells treated with XPO1 siRNA, expressing reporter YFP-NES<sub>PKI</sub>-NLS<sub>SV40</sub>. Bottom: Immunofluorescence of endogenous TDP-43 in HeLa cells treated with XPO1 siRNA.
- Western blotting of Cytosolic "C" or Nuclear "N" lysates from HeLa cells treated with either control or XPO1 siRNA. XPO1, cytosolic control GAPDH and nuclear control Histone H3 shown. Ladder on left, molecular weight in kDa.
- Immunofluorescence of HeLa cells expressing Flag WT TDP-43, in cells treated either by vehicle or Leptomycin B (LMB), 10 nM for 12 hours.
- Domain map of fusion protein NES<sub>REV</sub>-TDP-43. Peptide sequence of REV NES is detailed. Domain map formatted using IBS Cuckoo.<sup>43</sup>
- Immunofluorescence of HeLa cells expressing fusion protein NES<sub>REV</sub>-TDP-43, detected by TDP-43 antibody. Indicated cells were treated with XPO1 siRNA or Leptomycin B (LMB), 10 nM for 12 hours. For a), c), and e): Nuclei are stained with Hoechst. Images are representative of 3 independent experiments. Scale bar- 10  $\mu$ m

# Supplementary Figure S5

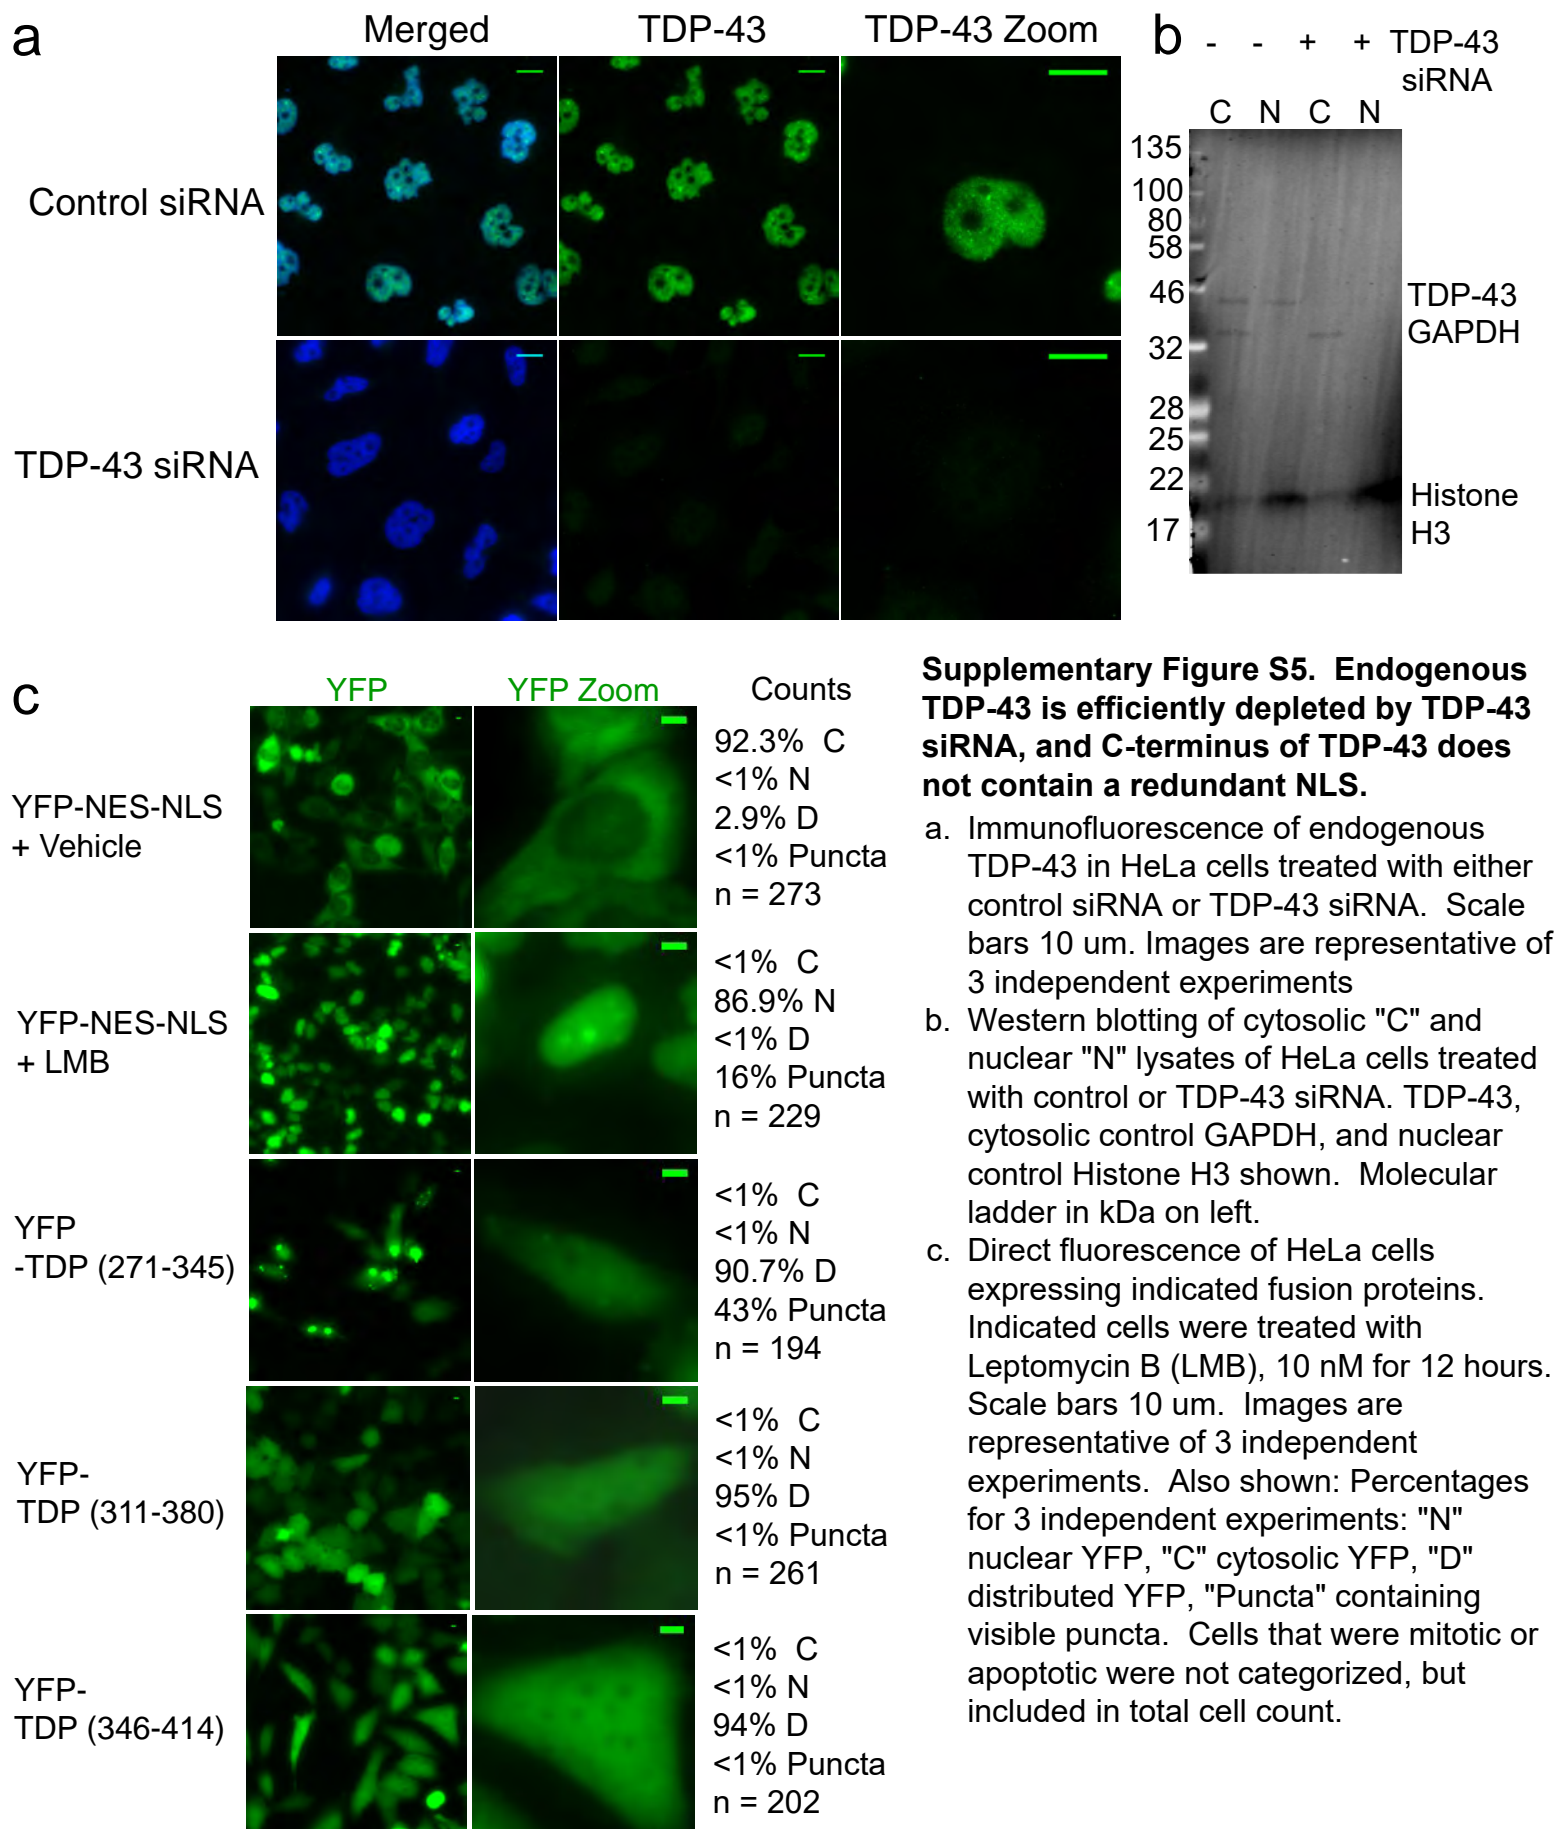

# Supplementary Figure S6

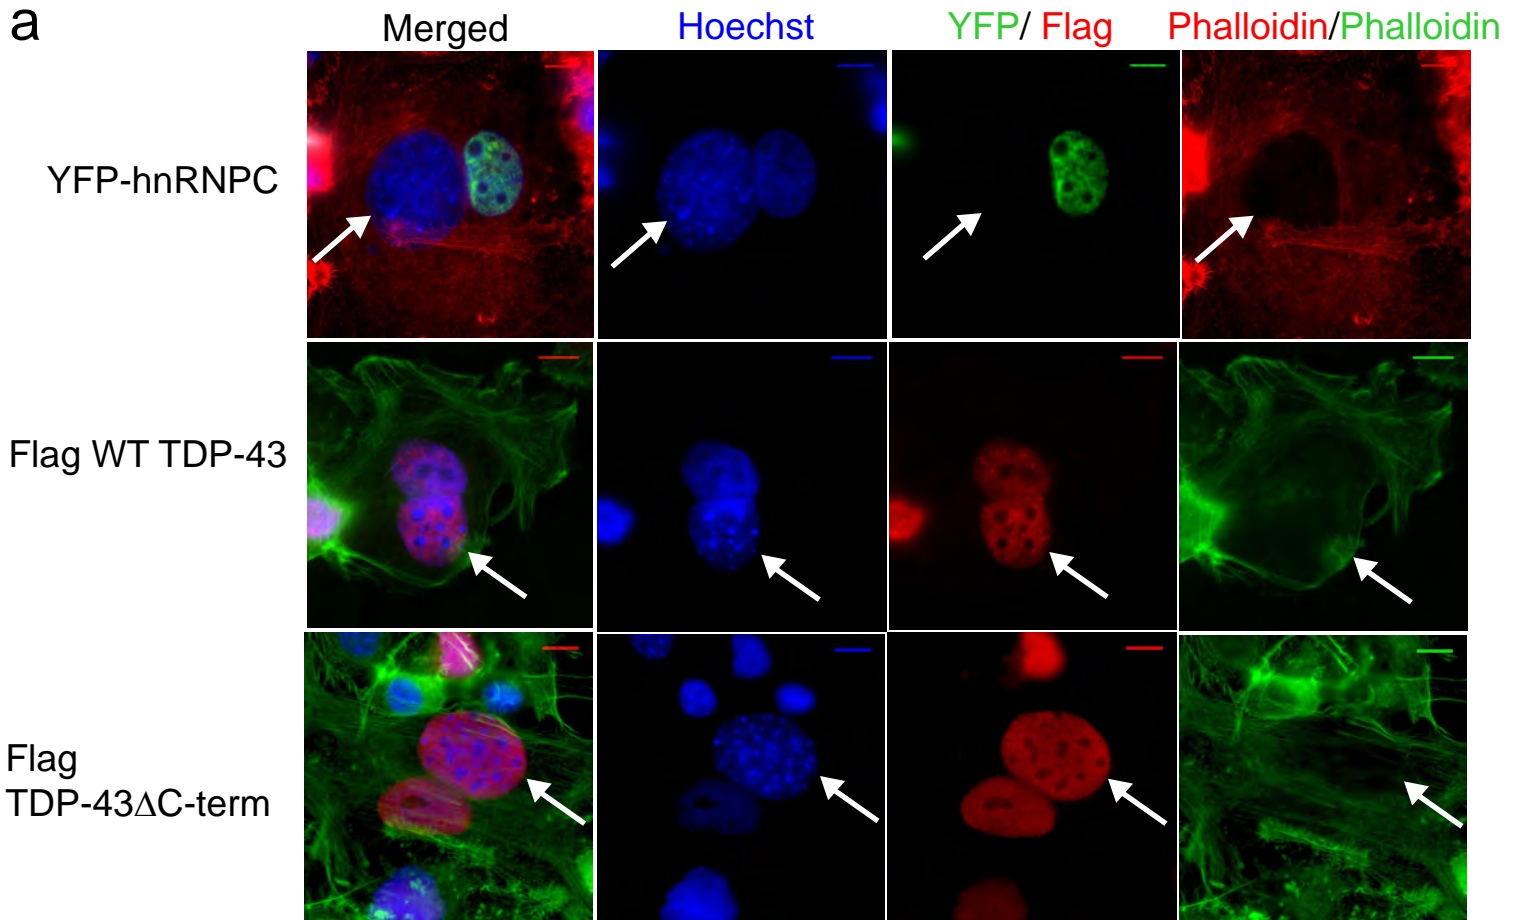

**b**

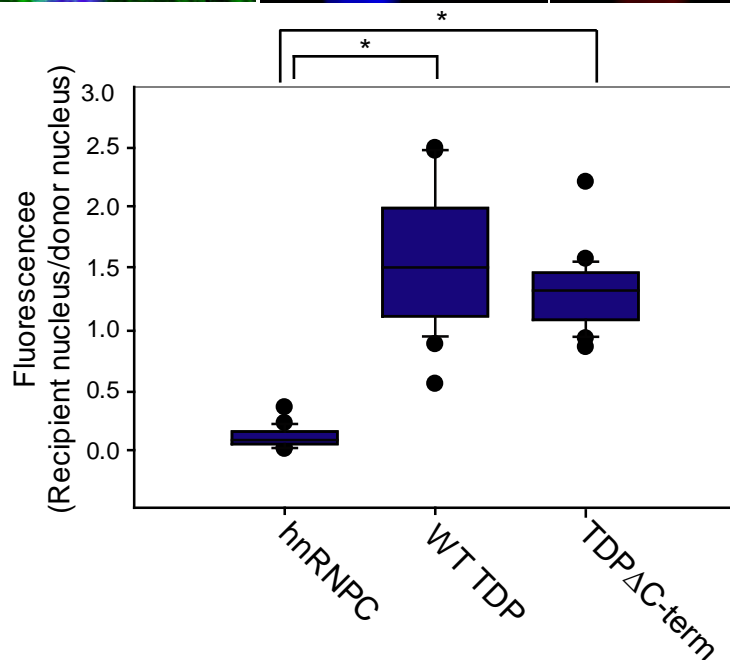

## Supplementary Figure S6. C-terminus is not required for TDP-43 nuclear export

- a. Example images from heterokaryon shuttling assay. YFP-hnRNPC was detected using direct fluorescence. Flag WT TDP-43 and Flag TDP-43  $\Delta$ C-terminus were detected using immunofluorescence with a Flag antibody. Nuclei were detected using Hoechst stain. Actin cytoskeleton was visualized using Phalloidin. Recipient nucleus indicated by arrow. Scale bars- 10 $\mu$ m.
- b. Quantitation of heterokaryon shuttling assay, as in Figure 3. Heterokaryons are pooled from 2 independent experiments. hnRNPC- 15 heterokaryons counted. Flag WT TDP-43- 22 heterokaryons counted. Flag TDP-43 $\Delta$ C terminus- 18 heterokaryons counted. \* indicates significant difference between groups,  $p < 0.001$  using Mann-Whitney Rank Sum Test.
